# Supplementary material for: Y-tube assisted coprecipitation synthesis of iron-based Prussian blue analogues cathode materials for sodium-ion batteries
Source: Royal Society of Chemistry journal article supplement (doi:10.1039/d4ra00762j), 2024-01-01
Supplement: d4ra00762j1.pdf [file d4ra00762j1.pdf]

Supplementary

**Y-tube Assisted Coprecipitation Synthesis of Iron-  
Based Prussian Blue Analogues Cathode Materials  
for Sodium-Ion batteries**

Ruizhong Zhang, Yuao Liu, Hongquan Liu, Yanjun Zhong\*, Yuan Zhang, Zhenguo Wu, Xinlong Wang

*Engineering Research Center of Comprehensive Utilization and Clean Processing of Phosphorus Resources of Ministry of Education, School of Chemical Engineering, Sichuan University, Chengdu 610065, China*

Corresponding Author:

E-mail address:

yjzhong@scu.edu.cn (Yanjun Zhong), Tel. /fax: +86-28-85405235

Table S1 Comparison of the electrochemical performances of the reported Iron-based PBAs

| Iron-based PBAs | Current density (mA g <sup>-1</sup> ) | Initial capacity (mAh g <sup>-1</sup> ) | Cycles | Capacity retention (%) | Current density (mA g <sup>-1</sup> ) | Capacity (mAh g <sup>-1</sup> ) | Voltage range(V) | Ref.      |
|-----------------|---------------------------------------|-----------------------------------------|--------|------------------------|---------------------------------------|---------------------------------|------------------|-----------|
| PB-H3           | 200                                   | 81.1                                    | 500    | 59.8                   | 5000                                  | 68.1                            | 2.0-4.2          | s1        |
| PB              | 34                                    | 116                                     | 100    | 4.5                    | 850                                   | 0.09                            | 2.0-4.0          | s2        |
| PB              | 200                                   | 119                                     | 500    | 56.9                   | 10000                                 | 41.7                            | 2.0-4.2          | s3        |
| PB-SP           | 50                                    | 93                                      | 50     | 80.0                   | 200                                   | 59                              | 2.0-4.0          | s4        |
| PB-1            | 100                                   | 70                                      | 100    | 57.1                   | 400                                   | 44                              | 2.0-4.5          | s5        |
| PB-L            | 85                                    | 98                                      | 100    | 61.2                   | 170                                   | 30                              | 2.0-4.0          | s6        |
| LQ-PB           | 50                                    | 80                                      | 300    | 56.2                   | 1000                                  | 51                              | 2.0-4.2          | s7        |
| PB              | 170                                   | 81                                      | 500    | 74.1                   | 1700                                  | 21                              | 2.0-4.0          | s8        |
| Y-PB-15         | 70                                    | 99.2                                    | 200    | 69.8                   | 1400                                  | 71.9                            | 2.0-4.0          | This work |

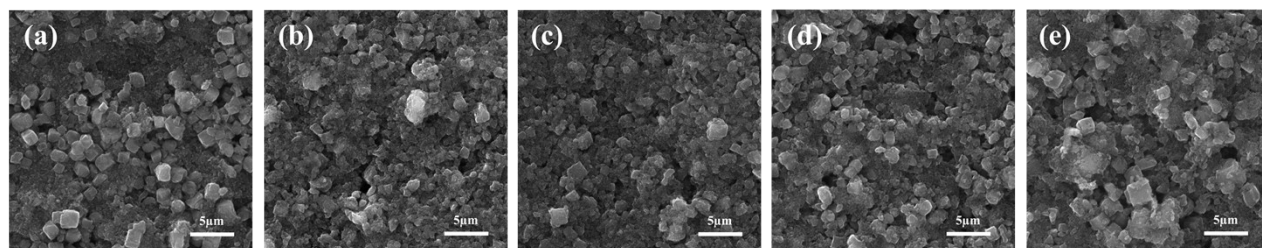

Figure S1 SEM images electrodes after 200 cycles at 0.5C for C-PB-0.3 (a), Y-PB-0.3 (b), Y-PB-15 (c), Y-PB-30 (d), and Y-PB-41(e)

## References

- (s1) Y. Liu, G. Wei, M. Ma and Y. Qiao, *Chem. Eur. J.*, 2017, **23**, 15991-15996.
- (s2) Z. Liu, W. Lv, X. Dong, S. Yang, P. Hu, P. Li and C. Shang, *Ionics*, 2023, **29**, 2093-2097.
- (s3) Y. Qiao, G. Wei, J. Cui, M. Zhang, X. Cheng, D. He, S. Li and Y. Liu, *Chem. Commun.*, 2019, **55**, 549-552.
- (s4) W. Zhuo, J. Li, X. Li, L. Ma, G. Yan, H. Wang, S. Tan and W. Mai, *Surf. Interfaces*, 2021, **23**, 100911.
- (s5) L. Li, P. Nie, Y. Chen and J. Wang, *J. Mater. Chem. A*, 2019, **7**, 12134-12144.
- (s6) P. Wang, Y. Li, D. Zhu, F. Gong, S. Fang, Y. Zhang and S. Sun, *Dalton Trans.*, 2022, **51**, 9622-9626.
- (s7) Q.-Y. Li, C. Xu, Y.-R. Liang, Z. Yang, N. Lege, J. Peng, L. Chen, W.-H. Lai, Y.-X. Wang, Z. Tao, M. Liu and S. -L. Chou, *ACS Appl. Mater. Interfaces*, 2022, **14**, 47747-47757.

(s8) H. Hu, W. Liu, M. Zhu, Y. Lin, Y. Liu, J. Zhang, T. Chen and K. Liu, *Mater. Lett.*, 2019, **249**, 206-209.
